# Supplementary material
Source: Springer Nature journal article supplement (https://www.springermedizin.de/resource/supplementary/12891_2014_2408_MOESM1_ESM.pdf/9510130)
Supplement: MOESM1 [file 9510130]

Recruiting

Screening for eligibility

Baseline

Intervention

Follow-up

Patients with RA, 18-70 years old

Screening for poor sleep by PSQI (telephone interview)

Screening for safety and sleep apnea

**Baseline**  
PSG, maximum work test, ECG, blood samples, questionnaires

Randomization

**Intervention group**  
Aerobic intermittent exercise on bicycle ergometer (n=22)

**Control group**  
No exercise intervention (n=22)

**End of intervention (6 – 8 weeks)**  
PSG, maximum work test, blood samples, questionnaires
